# Supplementary material for: A diamond-like cuprous coordination polymer based on the [Cu8I6]2+ cluster with multistimuli-responsive luminescence and iodine adsorption behavior
Source: Royal Society of Chemistry journal article supplement (doi:10.1039/d1tc05937h), 2022-01-01
Supplement: d1tc05937h1.pdf [file d1tc05937h1.pdf]

# Supporting Information

## Diamond-like Cuprous Coordination Polymer Based on $[\text{Cu}_8\text{I}_6]^{2+}$ Cluster with Multistimuli-responsive Luminescence and Iodine Adsorption Behavior

Han-Wen Zheng, Dong-Dong Yang, Qiong-Fang Liang, Yan-Ping Liu, Jia-Hui Shan, Qian-Qian Liu, Hong-Wei Tan, Ling Chen, and Xiang-Jun Zheng\*

Beijing Key Laboratory of Energy Conversion and Storage Materials, College of Chemistry, Beijing Normal University, Beijing, 100875, China.

### Corresponding author:

Tel.: +86-10-58805522; fax: +86-10-58802075.

E-mail address: [xjzheng@bnu.edu.cn](mailto:xjzheng@bnu.edu.cn) (X. -J. Zheng)

## Contents

**Fig. S1** The topological feature of complex **1**. Cyan spheres represent the  $[\text{Cu}_8\text{I}_6]^{2+}$  clusters, and blue lines represent the CN groups.

**Fig. S2** Oscilloscope traces of SHG signals of KDP and **1**.

**Fig. S3** (a) Differential scanning calorimetry (DSC) and (b) thermogravimetric analysis (TGA) of complex **1**.

**Fig. S4** (a) PL and delayed (1 ms) excitation and emission spectra and (b) PL decay curve at 400 nm of ligand PPh<sub>3</sub> at 77 K.

**Fig. S5** (a) PL and delayed (1 ms) excitation and emission spectra and (b) PL decay curve at 400 nm of **1** at 77 K.

**Fig. S6** The intensity at 400 nm, 460 nm, 560 nm and 615 nm in the temperature range of 77-297 K.

**Fig. S7** The halogen bonds in **1**.

**Fig. S8** PL decay curves at room temperature (297 K) of (a) **1** at 560 nm and **1G** at 645 nm.

**Fig. S9** Photographs of samples before and after adsorption and release process.

**Fig. S10** The I<sub>2</sub> release UV-vis spectra of complex **1** (1 mg) in ethanol (3 mL), the insets of figures are dynamic intensity plots (monitored at 217 nm) over time.

**Fig. S11** UV-vis spectra of iodine in ethanol at different concentrations.

**Fig. S12** Calibration plot of standard iodine by UV-vis spectra.

**Fig. S13** PXRD patterns of samples before and after adsorption and release process.

**Fig. S14** Emission spectra of crystalline sample (**1**) before and after adsorption and release process ( $\lambda_{\text{ex}} = 365$  nm).

**Scheme S1** Calculated frontier orbitals for [Cu<sub>8</sub>I<sub>6</sub>(CN)<sub>2</sub>(PPh<sub>3</sub>)<sub>4</sub>] unit.

**Scheme S2** Possible luminescence energy transition diagram for complex **1**.

**Table S1** Crystal data and structure refinement parameters of complex **1** and **1a**.

**Table S2** Selected Bond Lengths (Å) and Angles (deg) of complex **1**.

**Table S3** Selected Bond Lengths (Å) and Angles (deg) of complex **1a**.

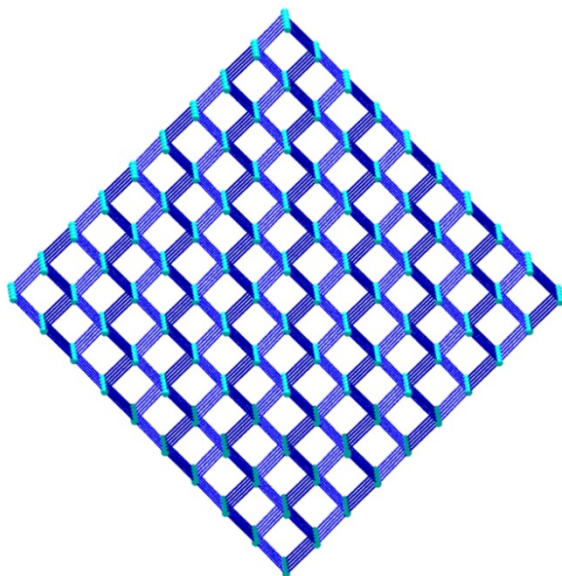

**Fig. S1** The topological feature of complex **1**. Cyan spheres represent the  $[\text{Cu}_8\text{I}_6]^{2+}$  clusters, and blue lines represent the CN groups.

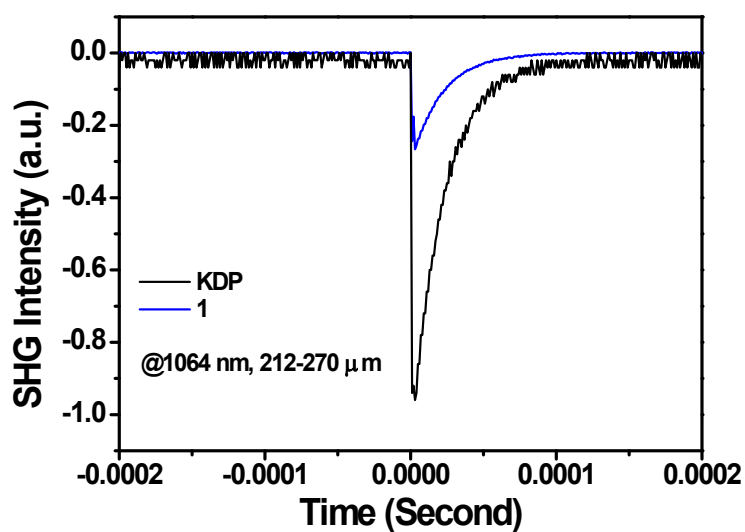

**Fig. S2** Oscilloscope traces of SHG signals of KDP and **1**.

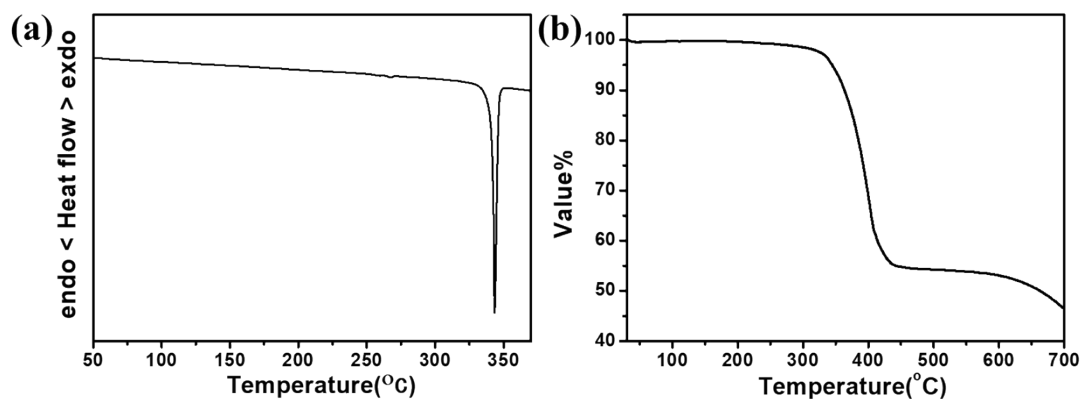

**Fig. S3** (a) Differential scanning calorimetry (DSC) and (b) thermogravimetric analysis (TGA) of complex **1**.

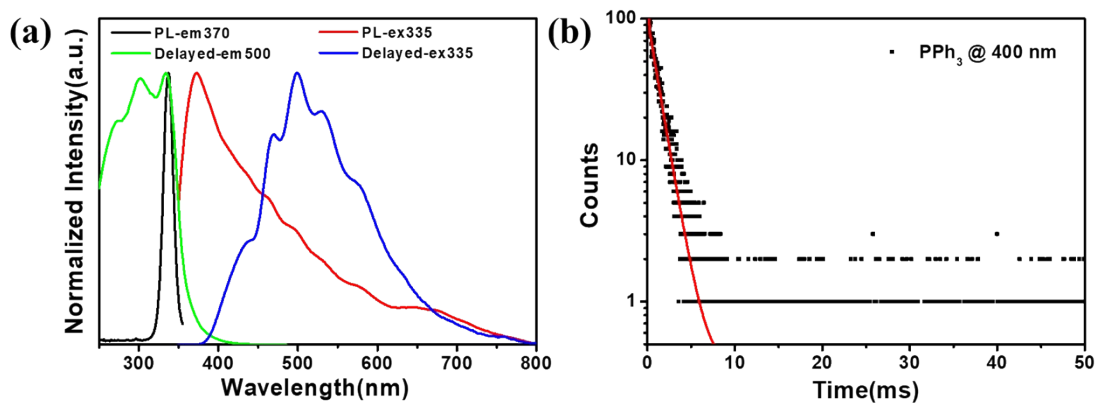

**Fig. S4** (a) PL and delayed (1 ms) excitation and emission spectra and (b) PL decay curve at 400 nm of ligand PPh<sub>3</sub> at 77 K.

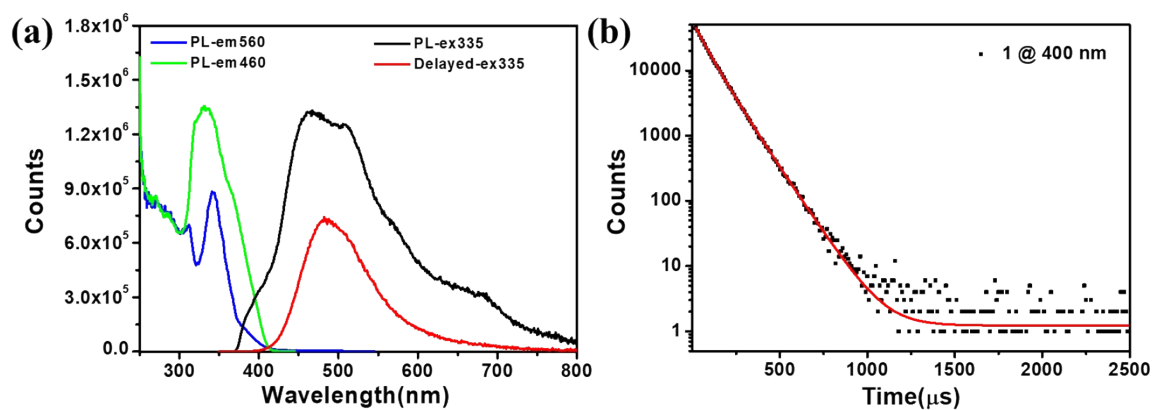

**Fig. S5** (a) PL and delayed (1 ms) excitation and emission spectra and (b) PL decay curve at 400 nm of **1** at 77 K.

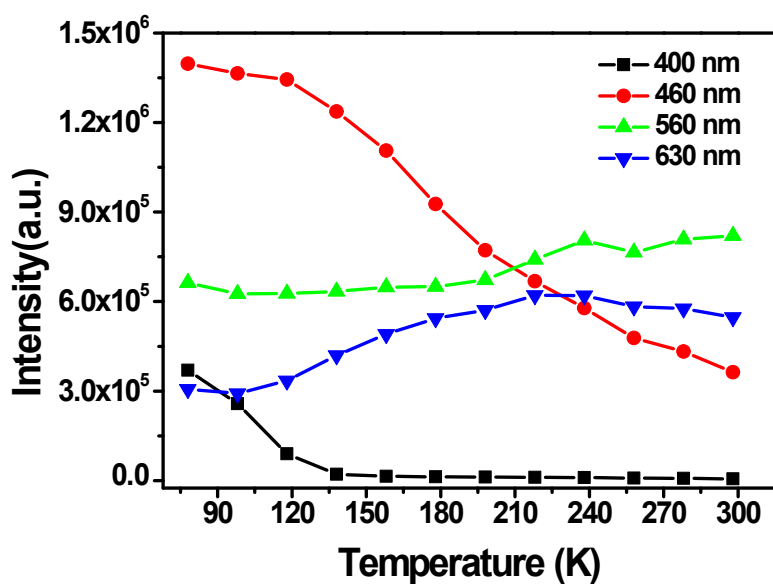

**Fig. S6** The intensity at 400 nm, 460 nm, 560 nm and 615 nm in the temperature range of 77-297 K.

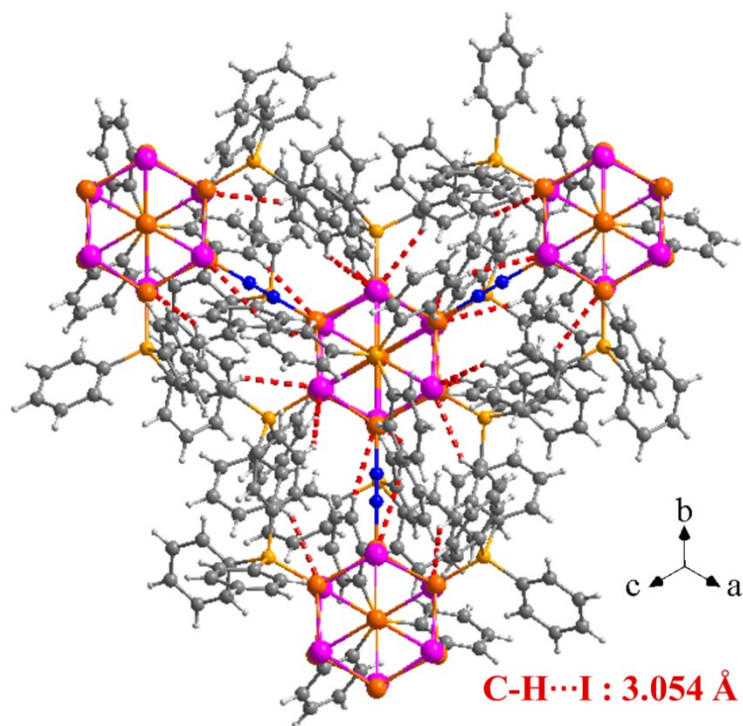

**Fig. S7** The halogen bonds in **1**.

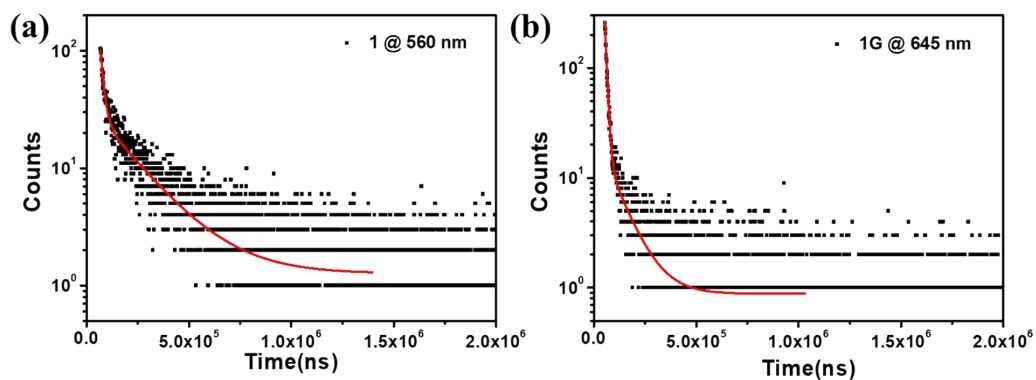

**Fig. S8** PL decay curves at room temperature (297 K) of (a) **1** at 560 nm and **1G** at 645 nm.

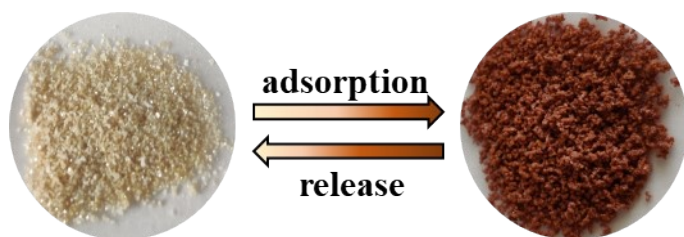

**Fig. S9** Photographs of samples before and after adsorption and release process.

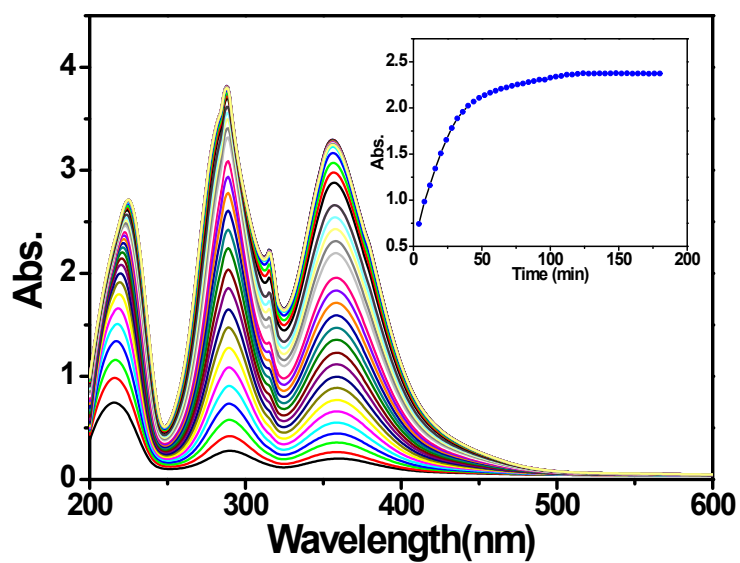

**Fig. S10** The  $I_2$  release UV-vis spectra of complex **1** (1 mg) in ethanol (3 mL), the insets of figures are dynamic intensity plots (monitored at 217 nm) over time.

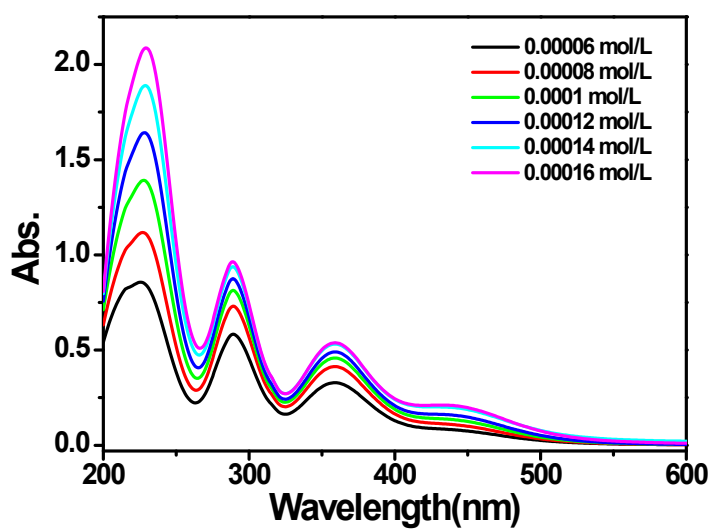

Fig. S11 UV-vis spectra of iodine in ethanol at different concentrations.

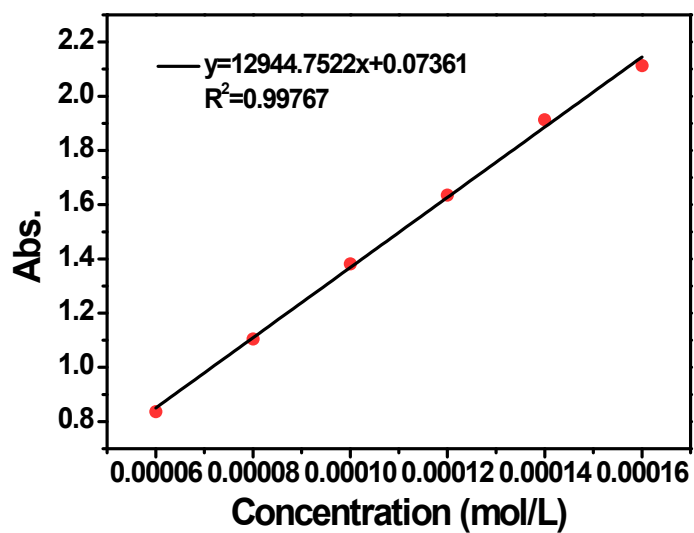

Fig. S12 Calibration plot of standard iodine by UV-vis spectra.



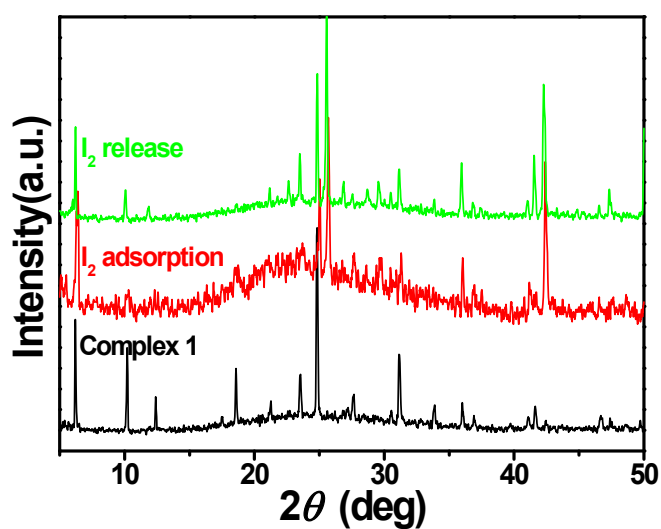

**Fig. S13** PXR D patterns of samples before and after adsorption and release process.

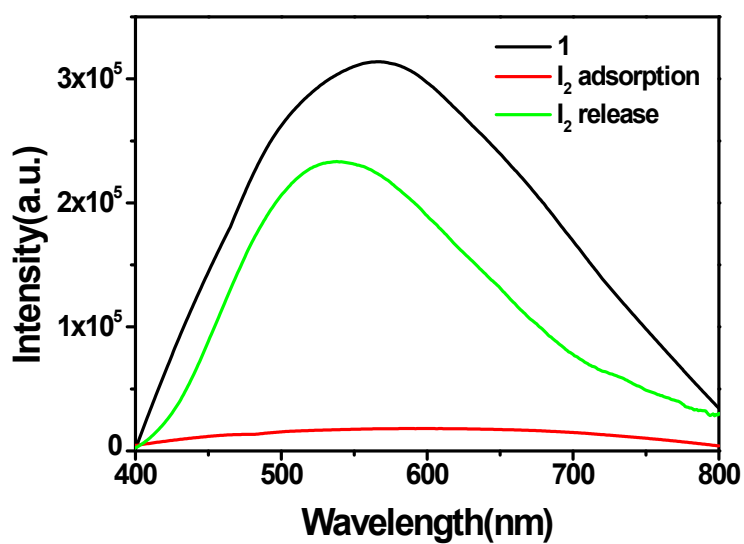

**Fig. S14** Emission spectra of crystalline sample (1) before and after adsorption and release process ( $\lambda_{ex} = 365$  nm).

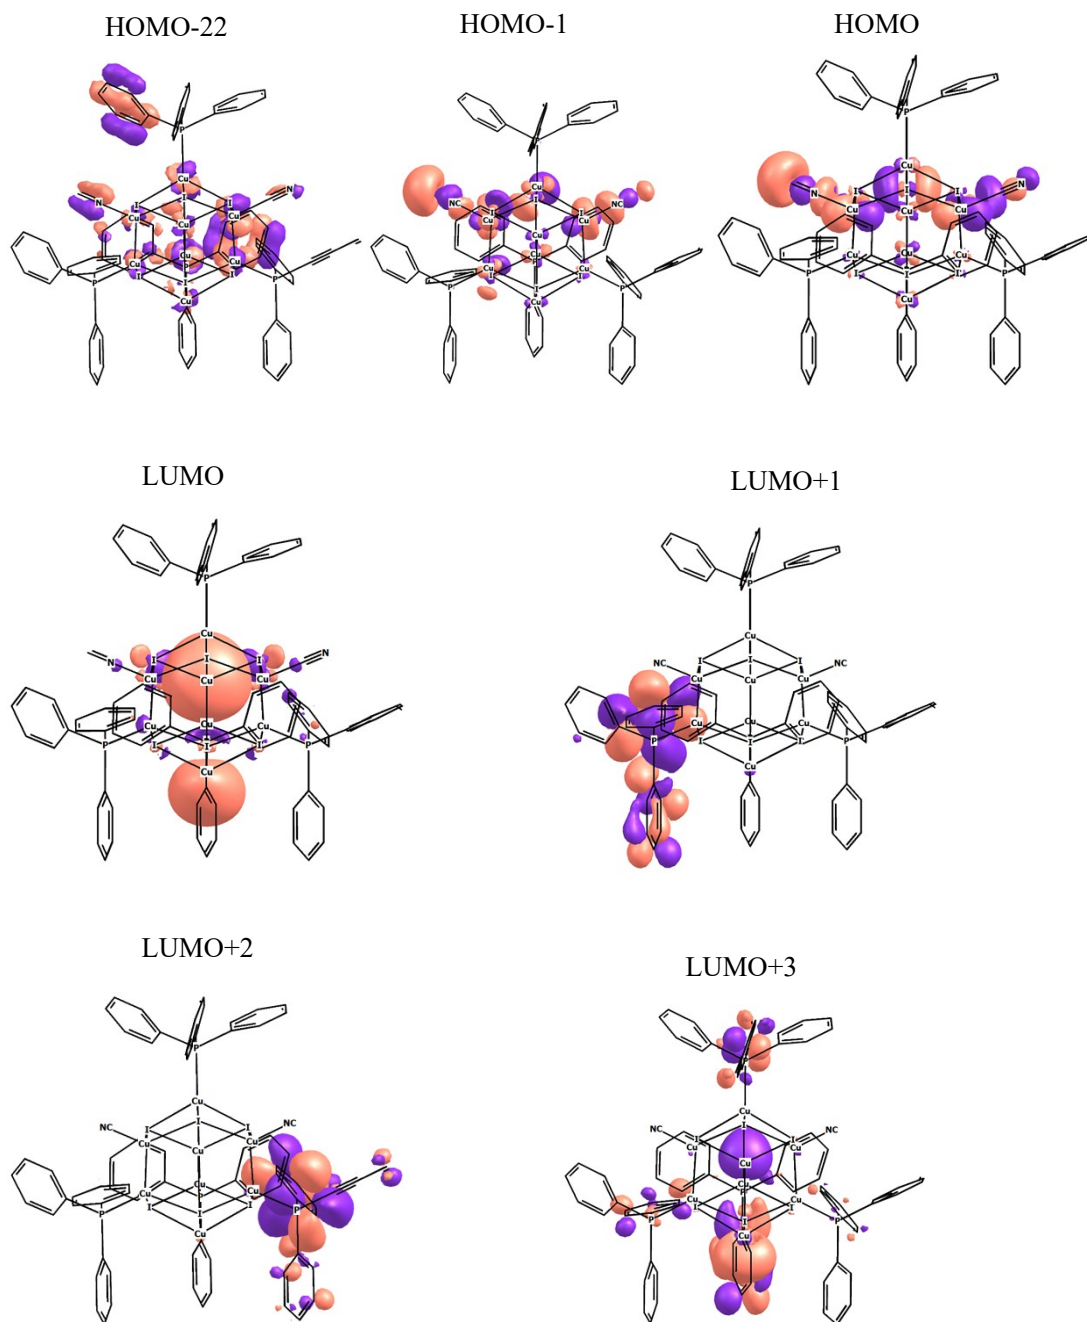

**Scheme S1** Calculated frontier orbitals for  $[\text{Cu}_8\text{I}_6(\text{CN})_2(\text{PPh}_3)_4]$  unit.

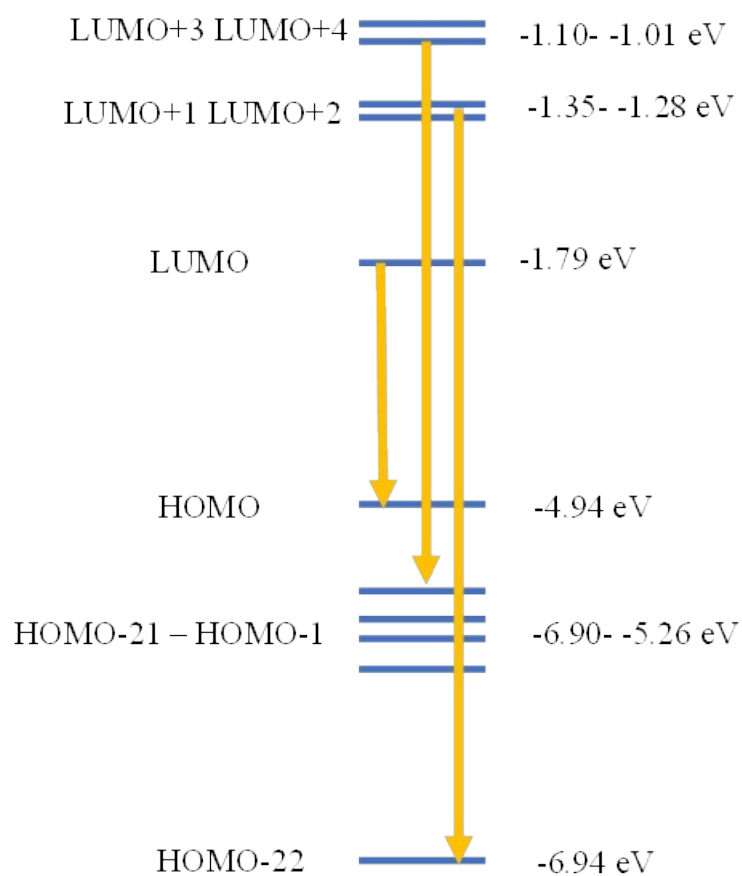

**Scheme S2** Possible luminescence energy transition diagram for complex

**1.**

**Table S1** Crystal data and structure refinement parameters of complex **1** and **1a**.

| Compound                                     | <b>1</b>                                                                                     | <b>1a</b>                                                                                    |
|----------------------------------------------|----------------------------------------------------------------------------------------------|----------------------------------------------------------------------------------------------|
| Empirical formula                            | C <sub>74</sub> H <sub>60</sub> Cu <sub>8</sub> I <sub>6</sub> N <sub>2</sub> P <sub>4</sub> | C <sub>74</sub> H <sub>60</sub> Cu <sub>8</sub> I <sub>6</sub> N <sub>2</sub> P <sub>4</sub> |
| Formula weight                               | 2370.84                                                                                      | 2370.71                                                                                      |
| Temperature/K                                | 100.00(10)                                                                                   | 272.5(5)                                                                                     |
| Crystal system                               | Cubic                                                                                        | Cubic                                                                                        |
| Space group                                  | <i>Fd</i> $\bar{3}$                                                                          | <i>Fd</i> $\bar{3}m$                                                                         |
| a/Å                                          | 24.6471(5)                                                                                   | 24.91275(9)                                                                                  |
| b/Å                                          | 24.6471(5)                                                                                   | 24.91275(9)                                                                                  |
| c/Å                                          | 24.6471(5)                                                                                   | 24.91275(9)                                                                                  |
| $\alpha$ /°                                  | 90                                                                                           | 90                                                                                           |
| $\beta$ /°                                   | 90                                                                                           | 90                                                                                           |
| $\gamma$ /°                                  | 90                                                                                           | 90                                                                                           |
| Volume/Å <sup>3</sup>                        | 14972.6(9)                                                                                   | 15461.98(17)                                                                                 |
| Z                                            | 8                                                                                            | 8                                                                                            |
| $\rho_{\text{calc}}$ g/cm <sup>3</sup>       | 2.104                                                                                        | 2.037                                                                                        |
| $\mu$ /mm <sup>-1</sup>                      | 23.003                                                                                       | 22.275                                                                                       |
| F(000)                                       | 9024.0                                                                                       | 9024.0                                                                                       |
| Radiation                                    | CuK $\alpha$ ( $\lambda$ = 1.54184)                                                          | CuK $\alpha$ ( $\lambda$ = 1.54184)                                                          |
| 2 $\theta$ range for data collection/°       | 10.152 to 132.904                                                                            | 11.782 to 152.906                                                                            |
| Index ranges                                 | -28 $\leq$ h $\leq$ 23, -18 $\leq$ k $\leq$ 11, -29 $\leq$ l $\leq$ 13                       | -31 $\leq$ h $\leq$ 31, -31 $\leq$ k $\leq$ 31, -30 $\leq$ l $\leq$ 30                       |
| Reflections collected                        | 3841                                                                                         | 44589                                                                                        |
| Independent reflections                      | 1077 [ $R_{\text{int}}$ = 0.0561, $R_{\text{sigma}}$ = 0.0288]                               | 821 [ $R_{\text{int}}$ = 0.1138, $R_{\text{sigma}}$ = 0.0145]                                |
| Data/restraints/parameters                   | 1077/0/72                                                                                    | 821/0/71                                                                                     |
| Goodness-of-fit on F <sup>2</sup>            | 1.119                                                                                        | 1.123                                                                                        |
| Final R indexes [ $I \geq 2\sigma(I)$ ]      | $R_1$ = 0.0370, $wR_2$ = 0.0958                                                              | $R_1$ = 0.0417, $wR_2$ = 0.1069                                                              |
| R indices (all data)                         | $R_1$ = 0.0377, $wR_2$ = 0.0964                                                              | $R_1$ = 0.0437, $wR_2$ = 0.1080                                                              |
| Largest diff. peak/hole (e Å <sup>-3</sup> ) | 0.89/-1.48                                                                                   | 0.87/-1.20                                                                                   |
| CCDC number                                  | 2127744                                                                                      | 2132839                                                                                      |

**Table S2** Selected Bond Lengths (Å) and Angles (deg) of complex **1**.

|                     |            |                       |            |
|---------------------|------------|-----------------------|------------|
| I1—Cu1 <sup>i</sup> | 2.6731 (5) | Cu1—I1 <sup>iii</sup> | 2.6731 (5) |
| I1—Cu1              | 2.6731 (5) | Cu1—P1                | 2.241 (2)  |

|                                         |             |                                        |             |
|-----------------------------------------|-------------|----------------------------------------|-------------|
| I1—Cu2                                  | 2.6894 (6)  | Cu2—I1 <sup>ii</sup>                   | 2.6894 (6)  |
| I1—Cu2 <sup>i</sup>                     | 2.6894 (6)  | Cu2—I1 <sup>iv</sup>                   | 2.6894 (6)  |
| Cu1—I1 <sup>ii</sup>                    | 2.6731 (5)  | Cu2—N7                                 | 1.943 (9)   |
| Cu1 <sup>i</sup> —I1—Cu1                | 117.02 (4)  | C2 <sup>v</sup> —P1—Cu1                | 114.40 (13) |
| Cu1 <sup>i</sup> —I1—Cu2                | 74.535 (19) | C2 <sup>iii</sup> —P1—Cu1              | 114.40 (13) |
| Cu1—I1—Cu2 <sup>i</sup>                 | 74.536 (19) | C2—P1—Cu1                              | 114.40 (13) |
| Cu1—I1—Cu2                              | 74.535 (19) | I1 <sup>iv</sup> —Cu2—I1 <sup>ii</sup> | 104.54 (3)  |
| Cu1 <sup>i</sup> —I1—Cu2 <sup>i</sup>   | 74.536 (19) | I1 <sup>iv</sup> —Cu2—I1               | 104.54 (3)  |
| Cu2—I1—Cu2 <sup>i</sup>                 | 118.61 (6)  | I1 <sup>ii</sup> —Cu2—I1               | 104.54 (3)  |
| I1 <sup>ii</sup> —Cu1—I1                | 105.45 (3)  | N7—Cu2—I1                              | 114.04 (3)  |
| I1 <sup>iii</sup> —Cu1—I1               | 105.45 (3)  | N7—Cu2—I1 <sup>iv</sup>                | 114.04 (3)  |
| I1 <sup>iii</sup> —Cu1—I1 <sup>ii</sup> | 105.45 (3)  | N7—Cu2—I1 <sup>ii</sup>                | 114.04 (3)  |
| P1—Cu1—I1 <sup>ii</sup>                 | 113.25 (2)  | N7 <sup>vi</sup> —N7—Cu2               | 180.0 (16)  |
| P1—Cu1—I1                               | 113.25 (2)  | C7 <sup>vi</sup> —N7—Cu2               | 180.0 (16)  |
| P1—Cu1—I1 <sup>iii</sup>                | 113.25 (2)  |                                        |             |

Symmetry codes: (i)  $x, -y+1/4, -z+1/4$ ; (ii)  $y+1/2, z, x-1/2$ ; (iii)  $z+1/2, -x+3/4, -y+1/4$ ; (iv)  $z+1/2, x-1/2, y$ ; (v)  $-y+3/4, -z+1/4, x-1/2$ ; (vi)  $-x+1, -y, -z$ .

**Table S3** Selected Bond Lengths (Å) and Angles (deg) of complex **1a**.

|                                         |             |                                        |             |
|-----------------------------------------|-------------|----------------------------------------|-------------|
| I1—Cu1 <sup>i</sup>                     | 2.6880 (9)  | Cu1—I1 <sup>iii</sup>                  | 2.6880 (9)  |
| I1—Cu1                                  | 2.6880 (9)  | Cu1—P1                                 | 2.248 (4)   |
| I1—Cu2 <sup>ii</sup>                    | 2.7233 (12) | Cu2—I1 <sup>iii</sup>                  | 2.7232 (12) |
| I1—Cu2                                  | 2.7232 (12) | Cu2—I1 <sup>i</sup>                    | 2.7232 (12) |
| Cu1—I1 <sup>ii</sup>                    | 2.6880 (9)  | Cu2—N7                                 | 2.085 (15)  |
| Cu1—I1—Cu1 <sup>i</sup>                 | 117.33 (8)  | I1 <sup>i</sup> —Cu2—I1                | 103.35 (6)  |
| Cu1 <sup>i</sup> —I1—Cu2                | 75.08 (3)   | I1 <sup>iii</sup> —Cu2—I1              | 103.35 (6)  |
| Cu1—I1—Cu2                              | 75.08 (3)   | I1 <sup>iii</sup> —Cu2—I1 <sup>i</sup> | 103.35 (6)  |
| Cu1 <sup>i</sup> —I1—Cu2 <sup>ii</sup>  | 75.08 (3)   | N7—Cu2—I1 <sup>i</sup>                 | 115.06 (5)  |
| Cu1—I1—Cu2 <sup>ii</sup>                | 75.08 (3)   | N7—Cu2—I1                              | 115.06 (5)  |
| Cu2—I1—Cu2 <sup>ii</sup>                | 120.65 (11) | N7—Cu2—I1 <sup>iii</sup>               | 115.06 (5)  |
| I1 <sup>iii</sup> —Cu1—I1               | 105.27 (5)  | C7—Cu2—I1 <sup>i</sup>                 | 115.06 (5)  |
| I1 <sup>ii</sup> —Cu1—I1                | 105.27 (5)  | C7—Cu2—I1                              | 115.06 (5)  |
| I1 <sup>ii</sup> —Cu1—I1 <sup>iii</sup> | 105.27 (5)  | C7—Cu2—I1 <sup>iii</sup>               | 115.06 (5)  |
| P1—Cu1—I1 <sup>ii</sup>                 | 113.40 (4)  | C2—P1—Cu1                              | 114.2 (3)   |
| P1—Cu1—I1                               | 113.40 (4)  | C2 <sup>vii</sup> —P1—Cu1              | 114.2 (3)   |
| P1—Cu1—I1 <sup>iii</sup>                | 113.40 (4)  | C2 <sup>iv</sup> —P1—Cu1               | 114.2 (3)   |
| C2 <sup>vi</sup> —P1—Cu1                | 114.2 (3)   | C2 <sup>viii</sup> —P1—Cu1             | 114.2 (3)   |
| C2 <sup>v</sup> —P1—Cu1                 | 114.2 (3)   |                                        |             |

Symmetry codes: (i)  $-y+3/4, x-1/2, -z+1/4$ ; (ii)  $y+1/2, -x+3/4, -z+1/4$ ; (iii)  $-z+3/4, -y+1/4, x-1/2$ ; (iv)  $z+1/2, y, x-1/2$ ; (v)  $x, -z+1/4, -y+1/4$ ; (vi)  $z+1/2, -x+3/4, -y+1/4$ ; (vii)  $-y+3/4, -x+3/4, z$ ; (viii)  $-y+3/4, -z+1/4, x-1/2$ .
